# Supplementary material
Source: MDPI journal article supplement (https://www.mdpi.com/2073-4433/11/4/340)
Supplement: s1 [file s1]

# Supplementary Materials: Chemical Composition of PM<sub>2.5</sub> and its Impact on Inhalation Health Risk Evaluation in a Central China

Na Wang, Xueyan Zhao, Jing Wang, Baohui Yin, Chunmei Geng, Dawei Niu, Wen Yang, Hao Yu and Wei Li

**Table S1.** Exposure parameter values used in the risk assessment calculations.

| Variable | Value                                   | References |
|----------|-----------------------------------------|------------|
| InhR     | 7.6 m <sup>3</sup> /day for children    | [37]       |
|          | 16.2 m <sup>3</sup> /day for adult      | [38]       |
| BW       | 15 kg for children                      | [39]       |
|          | 64.1 kg for adult                       | [38]       |
| EF       | 180 days/year                           | [40]       |
| ED       | 6 years for children                    | [40]       |
|          | 24 years for adults                     | [40]       |
| AT       | 70 year × 365 days/year for cancer risk | [37]       |
|          | ED × 365 days/year for non-cancer risk  | [37]       |

Note: InhR—inhale rate; BW—body weight; EF—exposure frequency; ED—exposure duration; AT—averaging time.

**Table S2.** The reference dose of non-carcinogenic metals and the slope factor of carcinogenic metals.

| Element                                                          | Pb                      | Cr                      | Co                      | Ni                      | Zn                      | As                      | Cd                   | V                    | Mn                      |
|------------------------------------------------------------------|-------------------------|-------------------------|-------------------------|-------------------------|-------------------------|-------------------------|----------------------|----------------------|-------------------------|
| R <sub>fd</sub> [41]<br>(mg kg <sup>-1</sup> day <sup>-1</sup> ) | 3.52 × 10 <sup>-3</sup> | 2.86 × 10 <sup>-5</sup> | 5.71 × 10 <sup>-6</sup> | 2.06 × 10 <sup>-2</sup> | 3.01 × 10 <sup>-1</sup> | 3.01 × 10 <sup>-4</sup> | 1 × 10 <sup>-3</sup> | 7 × 10 <sup>-3</sup> | 1.40 × 10 <sup>-5</sup> |
| SFa [41]<br>(mg kg <sup>-1</sup> day <sup>-1</sup> )             |                         | 42                      | 9.8                     | 0.84                    |                         | 15.1                    | 6.4                  |                      |                         |

Note: R<sub>fd</sub>—reference dose; SFa—slope factor.

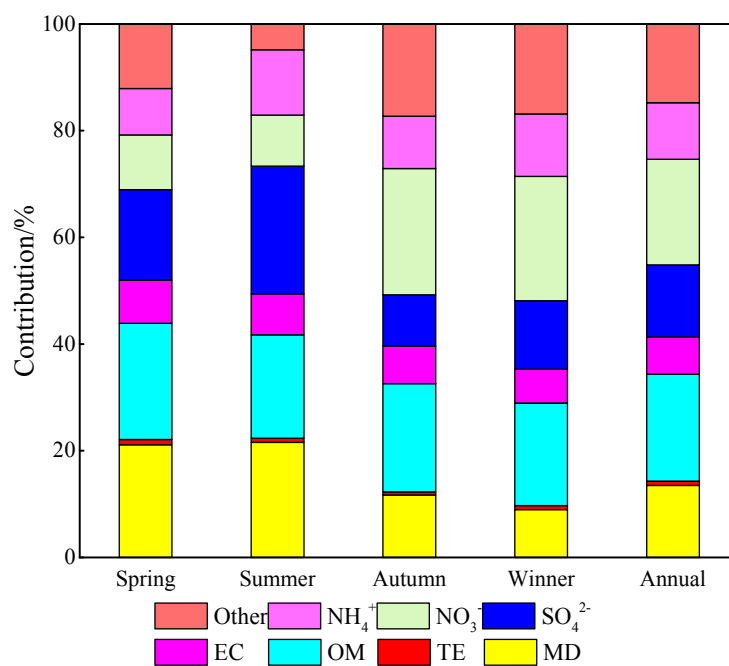

**Figure S1.** Seasonal and annual contributions of individual chemical components to PM<sub>2.5</sub>. OM is short for “organic matter”, TE is short for “trace elements”, MD is short for “mine dust”.
